# Supplementary material
Source: PubMed Central journal article supplement (PMC6912115)
Supplement: JVI.01232-19-s0001.pdf [file JVI.01232-19-s0001.pdf]

# 16 days post infection, spleen

## Germinal Center B cells

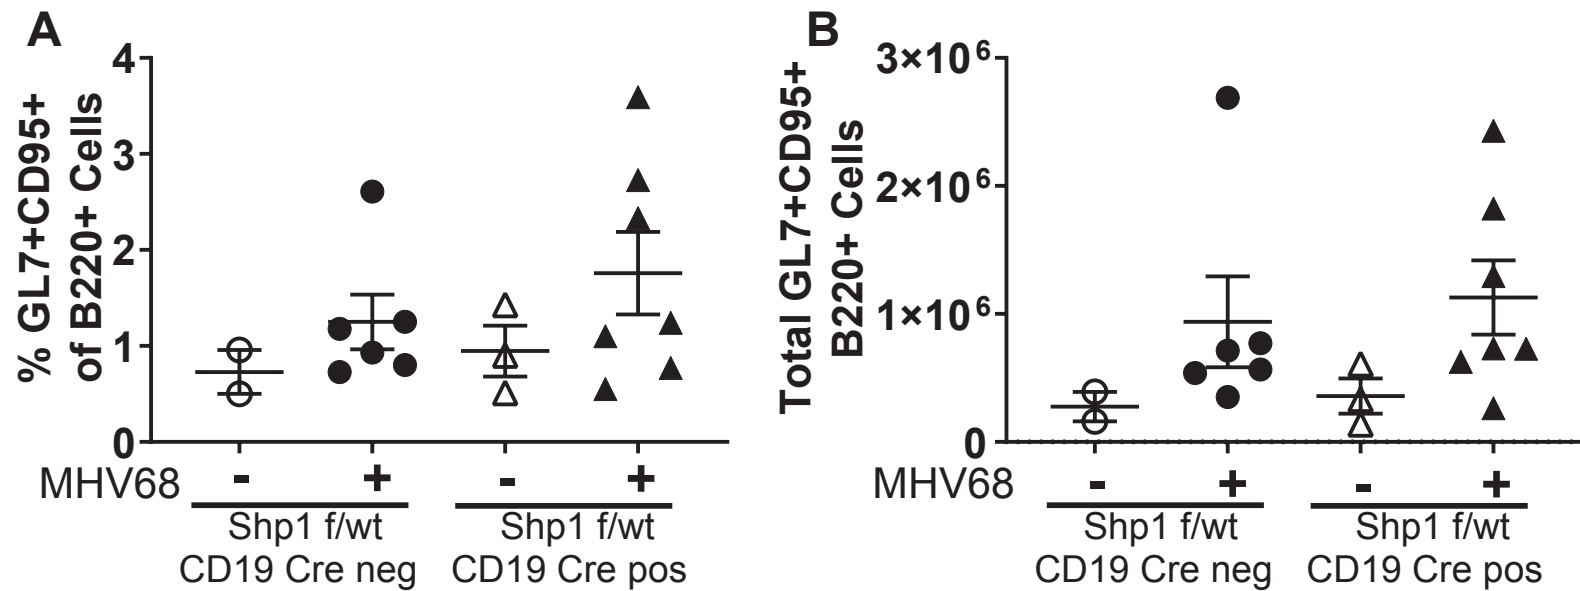

## T Follicular Helper cells

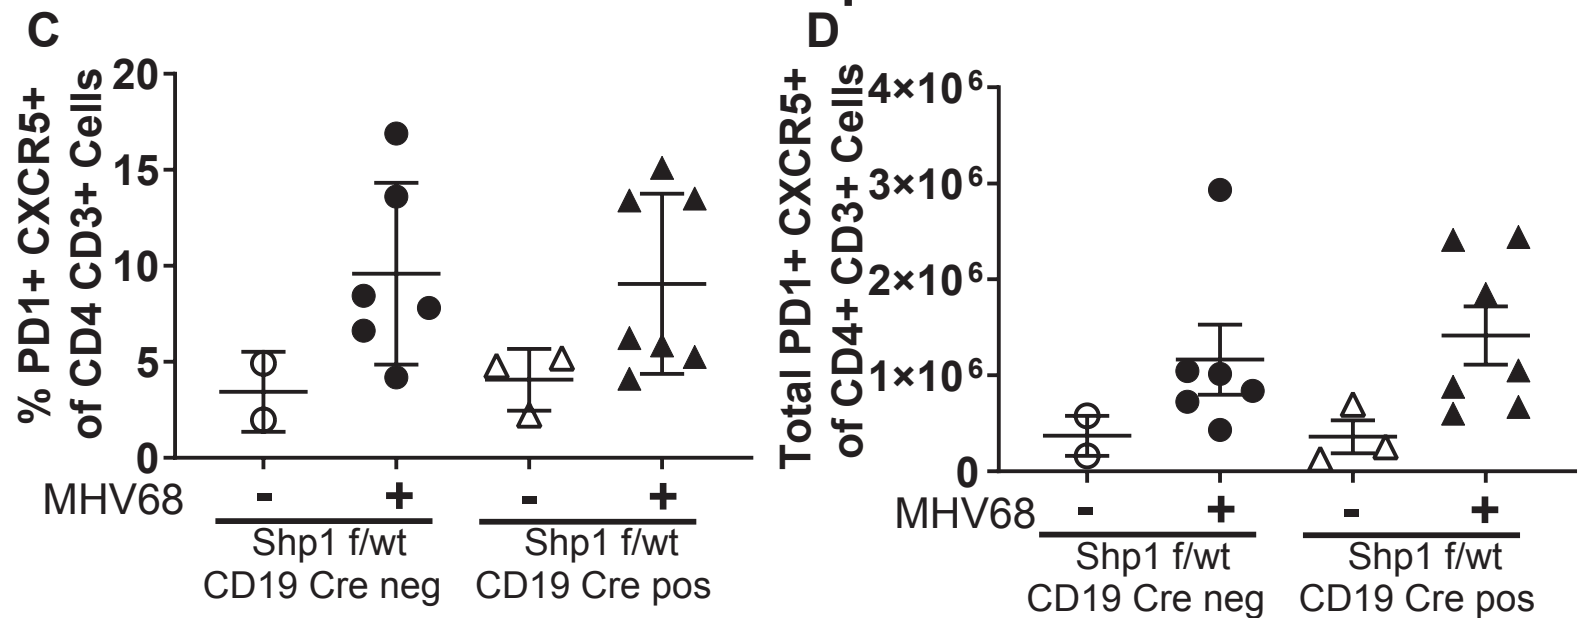

**Supplemental Figure 1. CD19 Cre hemizyosity does not alter MHV68-driven germinal center response.** CD19 is expressed as a part of the BCR, and as a result could affect B cell activation when expressed as a hemizygote. SHP1 f/wt CD19 Cre positive, and SHP1 f/wt CD19 Cre negative mice were infected as in Fig. 1 and splenocytes were harvested at 16 days post infection. Germinal center B cells were identified by positive surface staining of GL7 and CD95 of pregated, B220+ splenocytes and expressed as a frequency of B220+ cells (A) and absolute number (B). TFH cells were identified by CXCR5 and PD1 positive surface staining and expressed as a frequency of CD3+CD4+ cells (C) and absolute number (D). (A-D) Each symbol represents results for an individual spleen, and data from 2 independent experiments were pooled. (Level of significance:  $p=0.05^*$ ).
